# Supplementary material for: Nutritional properties of selected superfood extracts and their potential health benefits
Source: PeerJ. 2021 Nov 26;9:e12525. doi: 10.7717/peerj.12525 (PMC8628624; doi:10.7717/peerj.12525)
Supplement: Supplemental Information 4 [file peerj-09-12525-s004.xlsx]

## Sheet: Table 1
			Linum usitatissimum	Salvia hispanica	Helianthus annuus	Cannabis sativa
			Flax Seed	Chia Seed	Sunflower Seed	Hulled Hemp Seed	Hemp Flour
	Seed Nutrient Composition provided on packaging (per 100g)
	Energy (kJ/100g)		2172	2100	2755	2599	1680
	Protein (%)		21	21	21	31.3	17
	Carbohydrate (%)		<1	37	7.2	2	6.7
	Dietary Fibre (%)		28.8	35	8.8	3.3	67.1
	Fat (%)		43	29	57	54.2	8.9
	Fatty Acid Composition of Seed Oil
	Saturated Fatty Acids	Total (%)	10.8	11.8	11.9	10.8	12.7
	Myristic Acid (14:0) (%)		0	0	0.1	0.1	0
	Pentadecylic Acid (15:0) (%)		0	0	0	0	0
	Palmitic Acid (16:0) (%)		5.9	7.6	6.8	6.3	8
	Margaric Acid (17:0) (%)		0.1	0.1	0	0.1	0.1
	Stearic Acid (18:0) (%)		4.3	3.5	3.8	3.3	3.3
	Arachidic Acid (20:0) (%)		0.2	0.3	0.3	0.7	0.8
	Behenic Acid (22:0) (%)		0.1	0.1	0,7	0.2	0.3
	Lignoceric Acid (24:0) (%)		0.1	0.1	0.3	0.1	0.2
	Unsaturated Fatty Acids	Total (%)	89.2	88.2	88.1	89.2	87.3
	ω-3	Total (%)	56.4	61.3	0.1	14.5	15.7
	Alpha-Linoleic Acid (18:3 n-3) (%)		56.4	61.3	0.1	14.5	15.7
	ω-6	Total (%)	14.7	19.9	61.4	58.4	57.7
	Linoleic Acid (18:2 n-6) (%)		14.7	19.8	61.4	57.9	57.3
	Eicosadienoic Acid (20:2 n-6) (%)		0	0.1	0	0.1	0
	ω-7	Total (%)	1	0.9	0.8	0.8	0.9
	Palmitoleic Acid (16:1 n-7) (%)		0.1	0.1	0.1	0.1	0.1
	cis-Vaccenic Acid (18:1 n-7) (%)		0.9	0.9	0.7	0.7	0.8
	ω-9	Total (%)	17.1	6	25.8	15.4	12.9
	Oleic Acid (18:1 n-9) (%)		17	5.9	25.7	15.1	12.4
	Gondoic Acid (20:1 n-9) (%)		0.1	0.1	0.1	0.4	0.4
	ω-3:ω-6	Actual Ratio	3.837	3.084	0.002	0.249	0.272
		Representative Ratio	11:3	3:1	1:614	1:4	2:7
	Mineral Composition
	Na (mg/kg)		1073	0	0	0	0
	Mg (mg/kg)		4425	3525	3493	5359	3296
	K (mg/kg)		7482	7679	7930	9747	7367
	Ca (mg/kg)		1388	5689	1289	349	982
	Cr (mg/kg)		2	2	1.5	2	1.3
	Mn (mg/kg)		23.3	30.6	31.5	68	91.5
	Fe (mg/kg)		143	145.4	80.6	196	196.3
	Co (mg/kg)		0.9	0.3	0.1	0.1	0.1
	Ni (mg/kg)		1.2	1.8	5.2	53.2	0.6
	Cu (mg/kg)		17.4	17.7	24.2	12.2	14.1
	Zn (mg/kg)		43.7	52	66.1	81.7	53
	Se (mg/kg)		0.9	0.9	0	1.8	1
	Mo (mg/kg)		0.2	0.7	0.3	1.1	0.6
	I (mg/kg)		274.4	267.6	403.7	459.4	314.7

## Sheet: Extract Yield
	Data underlying Figure 1
		Extract Yield
		FSE	CSE	HSE	HHE	HFE
	Pre-extracted Material Mass (g)	4	4	4	4	4
	Extract Mass (g)	1.5785	0.6513	1.0024	0.3222	1.2935
	Extract Yield (%)	0.394625	0.162825	0.2506	0.08055	0.323375
	Pellet Yield (%)	0.605375	0.837175	0.7494	0.91945	0.676625

## Sheet: Caco-2 Viability
	Data underlying Figure 2 and Supplementary Figure 2
	CSE				FSE				HSE				HHE				HFE
	Treatment (dose (mg/mL), replicate)	Experiment Number	Viability (%)		Treatment (dose (mg/mL), replicate)	Experiment Number	Viability (%)		Treatment (dose (mg/mL), replicate)	Experiment Number	Viability (%)		Treatment (dose (mg/mL), replicate)	Experiment Number	Viability (%)		Treatment (dose (mg/mL), replicate)	Experiment Number	Viability (%)
	DMEMFCS,1	1	99.0609		DMEMFCS,1	1	95.7		DMEMFCS,1	1	95.7028		DMEMFCS,1	1	99.06		DMEMFCS,1	1	97.8466
	DMEMFCS,2	1	96.6811		DMEMFCS,2	1	99.37		DMEMFCS,2	1	99.3662		DMEMFCS,2	1	96.68		DMEMFCS,2	1	96.8598
	DMEMFCS,3	1	104.258		DMEMFCS,3	1	104.93		DMEMFCS,3	1	104.931		DMEMFCS,3	1	104.26		DMEMFCS,3	1	105.294
	0.0039,1	1	95.7415		0.0039,1	1	102.07		0.0039,1	1	100.41		0.0039,1	1	96.6		0.0039,1	1	109.373
	0.0039,2	1	96.2509		0.0039,2	1	98.97		0.0039,2	1	111.15		0.0039,2	1	94.22		0.0039,2	1	111.138
	0.0039,3	1	97.9164		0.0039,3	1	107.75		0.0039,3	1	129.301		0.0039,3	1	101.38		0.0039,3	1	96.5827
	0.0078,1	1	98.6994		0.0078,1	1	97.82		0.0078,1	1	97.1216		0.0078,1	1	90.54		0.0078,1	1	108.562
	0.0078,2	1	100.668		0.0078,2	1	99.98		0.0078,2	1	104.854		0.0078,2	1	94.96		0.0078,2	1	99.7536
	0.0078,3	1	95.5377		0.0078,3	1	106.61		0.0078,3	1	106.232		0.0078,3	1	108.49		0.0078,3	1	109.515
	0.0156,1	1	92.1344		0.0156,1	1	95.75		0.0156,1	1	95.5587		0.0156,1	1	94.66		0.0156,1	1	96.9428
	0.0156,2	1	96.0393		0.0156,2	1	99.38		0.0156,2	1	96.0942		0.0156,2	1	95.31		0.0156,2	1	100.256
	0.0156,2	1	101.587		0.0156,2	1	96.54		0.0156,2	1	126.172		0.0156,2	1	92		0.0156,2	1	94.3238
	0.0313,1	1	104.477		0.0313,1	1	102.23		0.0313,1	1	100.716		0.0313,1	1	96.47		0.0313,1	1	85.3336
	0.0313,2	1	93.8905		0.0313,2	1	101.82		0.0313,2	1	96.6404		0.0313,2	1	94.45		0.0313,2	1	104.615
	0.0313,3	1	121.554		0.0313,3	1	98.63		0.0313,3	1	113.953		0.0313,3	1	101.78		0.0313,3	1	96.8057
	0.0625,1	1	95.1178		0.0625,1	1	100.16		0.0625,1	1	98.4103		0.0625,1	1	93.85		0.0625,1	1	88.4996
	0.0625,2	1	95.2227		0.0625,2	1	99.7		0.0625,2	1	97.4513		0.0625,2	1	97.78		0.0625,2	1	92.7238
	0.0625,3	1	97.688		0.0625,3	1	100.1		0.0625,3	1	100.945		0.0625,3	1	96.02		0.0625,3	1	92.3943
	0.125,1	1	105.608		0.125,1	1	105.57		0.125,1	1	98.1198		0.125,1	1	94		0.125,1	1	95.0651
	0.125,2	1	100.957		0.125,2	1	106.54		0.125,2	1	104.788		0.125,2	1	94.5		0.125,2	1	99.3127
	0.125,3	1	116.401		0.125,3	1	108.3		0.125,3	1	117.861		0.125,3	1	100.22		0.125,3	1	92.1967
	0.25,1	1	100.147		0.25,1	1	120.82		0.25,1	1	103.989		0.25,1	1	100.68		0.25,1	1	108.348
	0.25,2	1	100.291		0.25,2	1	115.01		0.25,2	1	106.17		0.25,2	1	102.21		0.25,2	1	106.793
	0.25,3	1	106.067		0.25,3	1	136.77		0.25,3	1	109.98		0.25,3	1	97.83		0.25,3	1	99.4253
	0.5,1	1	111.827		0.5,1	1	151.16		0.5,1	1	116.653		0.5,1	1	114.52		0.5,1	1	101.6
	0.5,2	1	121.544		0.5,2	1	139.34		0.5,2	1	109.783		0.5,2	1	111.39		0.5,2	1	101.4
	0.5,3	1	133.013		0.5,3	1	157.36		0.5,3	1	123.775		0.5,3	1	114.65		0.5,3	1	110.771
	1,1	1	130.762		1,1	1	239.95		1,1	1	125.807		1,1	1	112.86		1,1	1	113.596
	1,2	1	145.224		1,2	1	197.58		1,2	1	127.411		1,2	1	122.97		1,2	1	111.631
	1,3	1	132.534		1,3	1	196.35		1,3	1	136.805		1,3	1	121.91		1,3	1	100.35
	DMEMFCS,1	2	98.1064		DMEMFCS,1	2	96.26		DMEMFCS,1	2	96.2591		DMEMFCS,1	2	98.11		DMEMFCS,1	2	88.3917
	DMEMFCS,2	2	98.3219		DMEMFCS,2	2	100.93		DMEMFCS,2	2	100.931		DMEMFCS,2	2	98.32		DMEMFCS,2	2	109.285
	DMEMFCS,3	2	103.572		DMEMFCS,3	2	102.81		DMEMFCS,3	2	102.81		DMEMFCS,3	2	103.57		DMEMFCS,3	2	102.323
	0.0039,1	2	103.493		0.0039,1	2	101.49		0.0039,1	2	93.3324		0.0039,1	2	99.38		0.0039,1	2	89.5155
	0.0039,2	2	94.8946		0.0039,2	2	94.31		0.0039,2	2	90.0439		0.0039,2	2	96.85		0.0039,2	2	91.8704
	0.0039,3	2	100.49		0.0039,3	2	99.56		0.0039,3	2	98.849		0.0039,3	2	103.05		0.0039,3	2	132.152
	0.0078,1	2	99.0832		0.0078,1	2	96.37		0.0078,1	2	96.1646		0.0078,1	2	96.48		0.0078,1	2	92.2675
	0.0078,2	2	91.6895		0.0078,2	2	92.68		0.0078,2	2	93.167		0.0078,2	2	96.02		0.0078,2	2	92.4692
	0.0078,3	2	93.6124		0.0078,3	2	93.46		0.0078,3	2	95.0732		0.0078,3	2	113.82		0.0078,3	2	123.465
	0.0156,1	2	97.3034		0.0156,1	2	99.29		0.0156,1	2	92.826		0.0156,1	2	93.54		0.0156,1	2	88.0935
	0.0156,2	2	95.1094		0.0156,2	2	93.52		0.0156,2	2	89.1856		0.0156,2	2	94		0.0156,2	2	85.7847
	0.0156,2	2	91.9583		0.0156,2	2	90.9		0.0156,2	2	97.3922		0.0156,2	2	92.63		0.0156,2	2	87.5525
	0.0313,1	2	96.6194		0.0313,1	2	95.74		0.0313,1	2	89.9086		0.0313,1	2	88.9		0.0313,1	2	88.9877
	0.0313,2	2	94.8599		0.0313,2	2	94.7		0.0313,2	2	86.2949		0.0313,2	2	94.72		0.0313,2	2	77.7619
	0.0313,3	2	90.76		0.0313,3	2	86.17		0.0313,3	2	94.7032		0.0313,3	2	89.08		0.0313,3	2	86.5731
	0.0625,1	2	103.485		0.0625,1	2	96.87		0.0625,1	2	89.2007		0.0625,1	2	94.43		0.0625,1	2	85.114
	0.0625,2	2	95.7471		0.0625,2	2	98.26		0.0625,2	2	93.2185		0.0625,2	2	90.25		0.0625,2	2	86.0658
	0.0625,3	2	98.4046		0.0625,3	2	94.61		0.0625,3	2	98.7975		0.0625,3	2	91.19		0.0625,3	2	84.5414
	0.125,1	2	98.2881		0.125,1	2	106.52		0.125,1	2	94.5758		0.125,1	2	96.05		0.125,1	2	94.105
	0.125,2	2	98.2068		0.125,2	2	100.19		0.125,2	2	87.9436		0.125,2	2	91.64		0.125,2	2	91.8735
	0.125,3	2	98.6132		0.125,3	2	100.84		0.125,3	2	97.0431		0.125,3	2	91.74		0.125,3	2	86.4934
	0.25,1	2	106.057		0.25,1	2	112.15		0.25,1	2	95.6271		0.25,1	2	99.21		0.25,1	2	93.321
	0.25,2	2	100.451		0.25,2	2	117.48		0.25,2	2	100.111		0.25,2	2	100.66		0.25,2	2	93.0263
	0.25,3	2	95.1713		0.25,3	2	116		0.25,3	2	101.126		0.25,3	2	93.57		0.25,3	2	93.7412
	0.5,1	2	114.789		0.5,1	2	132.76		0.5,1	2	115.44		0.5,1	2	105.95		0.5,1	2	100.442
	0.5,2	2	113.692		0.5,2	2	151.16		0.5,2	2	125.32		0.5,2	2	111.41		0.5,2	2	100.635
	0.5,3	2	106.943		0.5,3	2	152.9		0.5,3	2	117.5		0.5,3	2	128.04		0.5,3	2	97.8526
	1,1	2	115.698		1,1	2	255.62		1,1	2	133.61		1,1	2	115.89		1,1	2	102.499
	1,2	2	120.417		1,2	2	203.62		1,2	2	135.892		1,2	2	111.62		1,2	2	101.317
	1,3	2	116.129		1,3	2	242.57		1,3	2	134.489		1,3	2	121.32		1,3	2	91.5944
	DMEMFCS,1	3	100.159		DMEMFCS,1	3	103.46		DMEMFCS,1	3	103.456		DMEMFCS,1	3	100.16		DMEMFCS,1	3	94.9891
	DMEMFCS,2	3	95.614		DMEMFCS,2	3	99.11		DMEMFCS,2	3	99.1138		DMEMFCS,2	3	95.61		DMEMFCS,2	3	100.198
	DMEMFCS,3	3	104.227		DMEMFCS,3	3	97.43		DMEMFCS,3	3	97.43		DMEMFCS,3	3	104.23		DMEMFCS,3	3	104.813
	0.0039,1	3	102.346		0.0039,1	3	112.39		0.0039,1	3	112.394		0.0039,1	3	93		0.0039,1	3	116.545
	0.0039,2	3	93.5568		0.0039,2	3	89.33		0.0039,2	3	89.3322		0.0039,2	3	77.57		0.0039,2	3	85.9041
	0.0039,3	3	94.7965		0.0039,3	3	89.3		0.0039,3	3	89.2989		0.0039,3	3	74.15		0.0039,3	3	90.4173
	0.0078,1	3	95.0284		0.0078,1	3	98.93		0.0078,1	3	98.9251		0.0078,1	3	92.98		0.0078,1	3	106.41
	0.0078,2	3	97.5166		0.0078,2	3	105.21		0.0078,2	3	105.209		0.0078,2	3	70.79		0.0078,2	3	82.8629
	0.0078,3	3	97.7449		0.0078,3	3	74.83		0.0078,3	3	74.8348		0.0078,3	3	76.07		0.0078,3	3	86.1179
	0.0156,1	3	94.558		0.0156,1	3	115.2		0.0156,1	3	115.199		0.0156,1	3	91.88		0.0156,1	3	89.5154
	0.0156,2	3	93.2198		0.0156,2	3	104.38		0.0156,2	3	104.377		0.0156,2	3	80.32		0.0156,2	3	83.5658
	0.0156,2	3	98.2441		0.0156,2	3	85.96		0.0156,2	3	85.9623		0.0156,2	3	76.66		0.0156,2	3	87.3494
	0.0313,1	3	93.7688		0.0313,1	3	87.99		0.0313,1	3	87.9906		0.0313,1	3	62.58		0.0313,1	3	91.2028
	0.0313,2	3	95.4922		0.0313,2	3	110.99		0.0313,2	3	110.991		0.0313,2	3	67.05		0.0313,2	3	88.3295
	0.0313,3	3	97.312		0.0313,3	3	105.61		0.0313,3	3	105.613		0.0313,3	3	77.86		0.0313,3	3	85.6534
	0.0625,1	3	93.871		0.0625,1	3	92.76		0.0625,1	3	92.7612		0.0625,1	3	73.1		0.0625,1	3	85.6092
	0.0625,2	3	96.1571		0.0625,2	3	99.91		0.0625,2	3	99.9089		0.0625,2	3	67.24		0.0625,2	3	84.597
	0.0625,3	3	98.5394		0.0625,3	3	86.81		0.0625,3	3	86.8106		0.0625,3	3	80.14		0.0625,3	3	83.975
	0.125,1	3	101.816		0.125,1	3	76.27		0.125,1	3	76.2677		0.125,1	3	68.2		0.125,1	3	82.2637
	0.125,2	3	98.7615		0.125,2	3	109.06		0.125,2	3	109.059		0.125,2	3	68.29		0.125,2	3	82.7103
	0.125,3	3	96.8539		0.125,3	3	98.93		0.125,3	3	98.9279		0.125,3	3	96.37		0.125,3	3	83.7704
	0.25,1	3	97.7009		0.25,1	3	92.34		0.25,1	3	92.3377		0.25,1	3	72.77		0.25,1	3	92.7113
	0.25,2	3	100.748		0.25,2	3	103.88		0.25,2	3	103.877		0.25,2	3	73.81		0.25,2	3	84.6488
	0.25,3	3	99.5445		0.25,3	3	115.1		0.25,3	3	115.102		0.25,3	3	101.64		0.25,3	3	84.0362
	0.5,1	3	98.2995		0.5,1	3	110.56		0.5,1	3	110.564		0.5,1	3	71.91		0.5,1	3	91.7521
	0.5,2	3	98.3849		0.5,2	3	112.35		0.5,2	3	112.346		0.5,2	3	81.16		0.5,2	3	88.522
	0.5,3	3	98.2755		0.5,3	3	102.22		0.5,3	3	102.222		0.5,3	3	81.81		0.5,3	3	88.0186
	1,1	3	105.275		1,1	3	171.8		1,1	3	171.801		1,1	3	74.63		1,1	3	98.3027
	1,2	3	107.605		1,2	3	190.87		1,2	3	190.867		1,2	3	89.99		1,2	3	83.1614
	1,3	3	120.315		1,3	3	185.85		1,3	3	185.849		1,3	3	114.18		1,3	3	87.8413
	DMEMFCS,1	4	129.597		DMEMFCS,1	4	96.12		DMEMFCS,1	4	96.1229		DMEMFCS,1	4	129.6		DMEMFCS,1	4	99.8916
	DMEMFCS,2	4	81.3537		DMEMFCS,2	4	93.52		DMEMFCS,2	4	93.5187		DMEMFCS,2	4	81.35		DMEMFCS,2	4	99.9233
	DMEMFCS,3	4	89.0497		DMEMFCS,3	4	110.36		DMEMFCS,3	4	110.358		DMEMFCS,3	4	89.05		DMEMFCS,3	4	100.185
	0.0039,1	4	93.4903		0.0039,1	4	101.01		0.0039,1	4	90.6338		0.0039,1	4	140.72		0.0039,1	4	96.3048
	0.0039,2	4	103.742		0.0039,2	4	97.63		0.0039,2	4	97.8207		0.0039,2	4	101.57		0.0039,2	4	106.452
	0.0039,3	4	86.1536		0.0039,3	4	94.02		0.0039,3	4	91.1657		0.0039,3	4	88.08		0.0039,3	4	95.4394
	0.0078,1	4	88.6586		0.0078,1	4	96.82		0.0078,1	4	91.9279		0.0078,1	4	131.75		0.0078,1	4	94.4719
	0.0078,2	4	95.4375		0.0078,2	4	98.29		0.0078,2	4	84.0585		0.0078,2	4	94.59		0.0078,2	4	95.1477
	0.0078,3	4	87.4011		0.0078,3	4	89.15		0.0078,3	4	93.2922		0.0078,3	4	89.01		0.0078,3	4	92.4497
	0.0156,1	4	86.3239		0.0156,1	4	98.09		0.0156,1	4	87.198		0.0156,1	4	163.17		0.0156,1	4	94.0972
	0.0156,2	4	92.027		0.0156,2	4	96.02		0.0156,2	4	83.9694		0.0156,2	4	86.23		0.0156,2	4	96.6272
	0.0156,2	4	84.4587		0.0156,2	4	96.35		0.0156,2	4	92.2376		0.0156,2	4	85.33		0.0156,2	4	94.6403
	0.0313,1	4	89.1251		0.0313,1	4	101.69		0.0313,1	4	88.718		0.0313,1	4	96.79		0.0313,1	4	102.323
	0.0313,2	4	101.003		0.0313,2	4	103.69		0.0313,2	4	88.6054		0.0313,2	4	83.89		0.0313,2	4	97.0654
	0.0313,3	4	87.5265		0.0313,3	4	94.55		0.0313,3	4	92.1953		0.0313,3	4	80.82		0.0313,3	4	84.5279
	0.0625,1	4	93.8991		0.0625,1	4	98.53		0.0625,1	4	89.1097		0.0625,1	4	125.91		0.0625,1	4	93.7702
	0.0625,2	4	91.1855		0.0625,2	4	97.31		0.0625,2	4	89.2066		0.0625,2	4	81.41		0.0625,2	4	99.9495
	0.0625,3	4	75.8972		0.0625,3	4	95.54		0.0625,3	4	99.3125		0.0625,3	4	85.16		0.0625,3	4	89.6109
	0.125,1	4	95.7946		0.125,1	4	98.69		0.125,1	4	90.6675		0.125,1	4	125.35		0.125,1	4	98.5683
	0.125,2	4	86.7385		0.125,2	4	99.64		0.125,2	4	94.6576		0.125,2	4	81.25		0.125,2	4	102.924
	0.125,3	4	93.2335		0.125,3	4	95.08		0.125,3	4	97.2662		0.125,3	4	76.55		0.125,3	4	96.8397
	0.25,1	4	89.229		0.25,1	4	105.19		0.25,1	4	93.544		0.25,1	4	105.31		0.25,1	4	109.308
	0.25,2	4	98.9635		0.25,2	4	103.76		0.25,2	4	90.8		0.25,2	4	76.37		0.25,2	4	105.904
	0.25,3	4	87.1585		0.25,3	4	103.51		0.25,3	4	96.7311		0.25,3	4	80.54		0.25,3	4	97.2927
	0.5,1	4	94.8391		0.5,1	4	114.14		0.5,1	4	95.3806		0.5,1	4	114.97		0.5,1	4	98.9335
	0.5,2	4	101.832		0.5,2	4	112.68		0.5,2	4	100.541		0.5,2	4	82.53		0.5,2	4	112.48
	0.5,3	4	105.785		0.5,3	4	108.85		0.5,3	4	102.693		0.5,3	4	80.34		0.5,3	4	106.25
	1,1	4	98.6928		1,1	4	193.89		1,1	4	103.511		1,1	4	112.83		1,1	4	108.928
	1,2	4	105.337		1,2	4	134.62		1,2	4	107.97		1,2	4	82.61		1,2	4	109.667
	1,3	4	99.4136		1,3	4	116.12		1,3	4	108.866		1,3	4	96.63		1,3	4	106.388
	Estimated means from GEE				Estimated means from GEE				Estimated means from GEE				Estimated means from GEE				Estimated means from GEE
	Treatment (mg/mL)	Estimated Mean Viablity (%)	SE	P value (vs. DMEM+FCS)	Treatment (mg/mL)	Estimated Mean Viablity (%)	SE	P value (vs. DMEM+FCS)	Treatment (mg/mL)	Estimated Mean Viablity (%)	SE	P value (vs. DMEM+FCS)	Treatment (mg/mL)	Estimated Mean Viablity (%)	SE	P value (vs. DMEM+FCS)	Treatment (mg/mL)	Estimated Mean Viablity (%)	SE	P value (vs. DMEM+FCS)
	0	100			0	100			0	100			0	100			0	100
	0.0039	96.906	0.916624		0.0039	98.9854	1.16667		0.0039	99.4777	4.143		0.0039	97.2138	5.10999		0.0039	101.808	1.69139
	0.0078	95.0898	1.46372		0.0078	95.8471	1.65427		0.0078	95.0717	2.38965		0.0078	96.293	4.8847		0.0078	98.6243	2.93944
	0.0156	93.5803	1.75585		0.0156	97.6154	1.32181		0.0156	97.1809	3.56066		0.0156	95.4767	5.13857		0.0156	91.5624	2.32206
	0.0313	97.199	2.77571		0.0313	98.6519	1.88181		0.0313	96.3608	3.17079		0.0313	86.1984	5.25831		0.0313	90.765	2.28923
	0.0625	94.6012	2.28634	0.0182103	0.0625	96.7129	1.21299	0.0067	0.0625	94.5944	1.27092	0	0.0625	89.7067	4.78711	0.0315	0.0625	88.9042	2.0441	0
	0.125	99.2726	2.79652	0.794786	0.125	100.468	2.29206	0.8382	0.125	97.2647	2.8021	0.329	0.125	90.3478	3.71439	0.0094	0.125	92.1769	3.07853	0.011
	0.25	98.4607	1.99205	0.439691	0.25	111.834	4.24501	0.0053	0.25	100.783	2.47141	0.7514	0.25	92.0505	3.61018	0.0277	0.25	97.3796	3.73428	0.4829
	0.5	108.269	4.73742	0.0809161	0.5	128.791	9.37168	0.0021	0.5	111.018	3.88958	0.0046	0.5	99.889	7.65524	0.9884	0.5	99.8881	3.23575	0.9724
	1	116.45	6.38893	0.01003	1	194.07	16.038	0	1	138.573	13.8264	0.0053	1	106.453	5.7316	0.2602	1	101.273	3.89375	0.7437

## Sheet: IEC-6 Viability
	Data underlying Figure 3 and Supplementary Figure 3
	CSE				FSE				HSE				HHE				HFE
	Treatment (dose (mg/mL), replicate)	Experiment Number	Viability (%)		Treatment (dose (mg/mL), replicate)	Experiment Number	Viability (%)		Treatment (dose (mg/mL), replicate)	Experiment Number	Viability (%)		Treatment (dose (mg/mL), replicate)	Experiment Number	Viability (%)		Treatment (dose (mg/mL), replicate)	Experiment Number	Viability (%)
	DMEMFCS,1	1	106.858		DMEMFCS,1	1	102.87		DMEMFCS,1	1	102.87		DMEMFCS,1	1	106.858		DMEMFCS,1	1	106.858
	DMEMFCS,2	1	87.4447		DMEMFCS,2	1	107.25		DMEMFCS,2	1	107.25		DMEMFCS,2	1	87.4447		DMEMFCS,2	1	87.4447
	DMEMFCS,3	1	105.697		DMEMFCS,3	1	89.88		DMEMFCS,3	1	89.88		DMEMFCS,3	1	105.697		DMEMFCS,3	1	105.697
	0.0039,1	1	111.094		0.0039,1	1	80.97		0.0039,1	1	79.4562		0.0039,1	1	95.2234		0.0039,1	1	111.094
	0.0039,2	1	84.4376		0.0039,2	1	314.05		0.0039,2	1	87.9154		0.0039,2	1	100.154		0.0039,2	1	84.4376
	0.0039,3	1	87.8274		0.0039,3	1	85.5		0.0039,3	1	82.9305		0.0039,3	1	86.2866		0.0039,3	1	87.8274
	0.0078,1	1	93.0663		0.0078,1	1	104.683		0.0078,1	1	82.3263		0.0078,1	1	77.9661		0.0078,1	1	93.0663
	0.0078,2	1	79.1988		0.0078,2	1	282.024		0.0078,2	1	88.9728		0.0078,2	1	75.1926		0.0078,2	1	79.1988
	0.0078,3	1	85.5162		0.0078,3	1	85.0453		0.0078,3	1	77.6435		0.0078,3	1	86.2866		0.0078,3	1	85.5162
	0.0156,1	1	94.453		0.0156,1	1	81.87		0.0156,1	1	84.29		0.0156,1	1	98.9214		0.0156,1	1	94.453
	0.0156,2	1	90.6009		0.0156,2	1	588.07		0.0156,2	1	93.9577		0.0156,2	1	79.1988		0.0156,2	1	90.6009
	0.0156,2	1	88.4438		0.0156,2	1	79.76		0.0156,2	1	91.3897		0.0156,2	1	78.2743		0.0156,2	1	88.4438
	0.0313,1	1	88.1356		0.0313,1	1	91.2387		0.0313,1	1	81.2689		0.0313,1	1	81.9723		0.0313,1	1	88.1356
	0.0313,2	1	86.9029		0.0313,2	1	670.091		0.0313,2	1	93.3535		0.0313,2	1	82.7427		0.0313,2	1	86.9029
	0.0313,3	1	88.7519		0.0313,3	1	83.8369		0.0313,3	1	83.9879		0.0313,3	1	86.1325		0.0313,3	1	88.7519
	0.0625,1	1	106.163		0.0625,1	1	97.7341		0.0625,1	1	82.7795		0.0625,1	1	92.1418		0.0625,1	1	106.163
	0.0625,2	1	77.812		0.0625,2	1	327.795		0.0625,2	1	84.5921		0.0625,2	1	77.3498		0.0625,2	1	77.812
	0.0625,3	1	90.2928		0.0625,3	1	89.1239		0.0625,3	1	77.6435		0.0625,3	1	76.2712		0.0625,3	1	90.2928
	0.125,1	1	91.5254		0.125,1	1	109.366		0.125,1	1	80.5136		0.125,1	1	84.4376		0.125,1	1	91.5254
	0.125,2	1	84.4376		0.125,2	1	598.489		0.125,2	1	90.6344		0.125,2	1	76.1171		0.125,2	1	84.4376
	0.125,3	1	91.8336		0.125,3	1	95.1662		0.125,3	1	84.8943		0.125,3	1	83.0508		0.125,3	1	91.8336
	0.25,1	1	106.934		0.25,1	1	107.251		0.25,1	1	84.4411		0.25,1	1	85.208		0.25,1	1	106.934
	0.25,2	1	99.2296		0.25,2	1	212.991		0.25,2	1	104.985		0.25,2	1	84.5917		0.25,2	1	99.2296
	0.25,3	1	95.0693		0.25,3	1	100.755		0.25,3	1	82.9305		0.25,3	1	96.4561		0.25,3	1	95.0693
	0.5,1	1	109.399		0.5,1	1	109.366		0.5,1	1	103.474		0.5,1	1	98.7673		0.5,1	1	109.399
	0.5,2	1	95.2234		0.5,2	1	575.529		0.5,2	1	119.789		0.5,2	1	90.2928		0.5,2	1	95.2234
	0.5,3	1	100.462		0.5,3	1	119.94		0.5,3	1	101.36		0.5,3	1	95.6857		0.5,3	1	100.462
	1,1	1	125.116		1,1	1	124.018		1,1	1	141.39		1,1	1	104.16		1,1	1	125.116
	1,2	1	134.669		1,2	1	122.054		1,2	1	127.95		1,2	1	111.402		1,2	1	134.669
	1,3	1	125.424		1,3	1	132.175		1,3	1	138.37		1,3	1	97.2265		1,3	1	125.424
	DMEMFCS,1	2	92.4651		DMEMFCS,1	2	98.3094		DMEMFCS,1	2	98.3094		DMEMFCS,1	2	92.4651		DMEMFCS,1	2	98.0141
	DMEMFCS,2	2	112.87		DMEMFCS,2	2	103.495		DMEMFCS,2	2	103.495		DMEMFCS,2	2	112.87		DMEMFCS,2	2	104.962
	DMEMFCS,3	2	94.6653		DMEMFCS,3	2	98.1951		DMEMFCS,3	2	98.1951		DMEMFCS,3	2	94.6653		DMEMFCS,3	2	97.0237
	0.0039,1	2	100.585		0.0039,1	2	97.9965		0.0039,1	2	100.276		0.0039,1	2	96.8992		0.0039,1	2	89.4051
	0.0039,2	2	119.158		0.0039,2	2	107.647		0.0039,2	2	95.8184		0.0039,2	2	100.057		0.0039,2	2	95.9193
	0.0039,3	2	101.336		0.0039,3	2	102.378		0.0039,3	2	103.093		0.0039,3	2	97.643		0.0039,3	2	90.3969
	0.0078,1	2	100.686		0.0078,1	2	96.5501		0.0078,1	2	97.5747		0.0078,1	2	104.317		0.0078,1	2	91.7115
	0.0078,2	2	111.168		0.0078,2	2	103.683		0.0078,2	2	98.728		0.0078,2	2	109.598		0.0078,2	2	102.075
	0.0078,3	2	101.021		0.0078,3	2	97.5551		0.0078,3	2	99.9295		0.0078,3	2	102.92		0.0078,3	2	91.3104
	0.0156,1	2	98.6458		0.0156,1	2	99.7201		0.0156,1	2	94.978		0.0156,1	2	93.553		0.0156,1	2	95.6147
	0.0156,2	2	109.718		0.0156,2	2	103.217		0.0156,2	2	99.5444		0.0156,2	2	110.213		0.0156,2	2	93.4851
	0.0156,2	2	98.4573		0.0156,2	2	103.759		0.0156,2	2	105.01		0.0156,2	2	99.1494		0.0156,2	2	87.7155
	0.0313,1	2	103.845		0.0313,1	2	98.6877		0.0313,1	2	101.054		0.0313,1	2	97.4064		0.0313,1	2	106.86
	0.0313,2	2	104.908		0.0313,2	2	112.988		0.0313,2	2	100.157		0.0313,2	2	106.634		0.0313,2	2	99.8607
	0.0313,3	2	102.53		0.0313,3	2	98.2598		0.0313,3	2	100.742		0.0313,3	2	99.9414		0.0313,3	2	89.9139
	0.0625,1	2	108.695		0.0625,1	2	104.476		0.0625,1	2	104.197		0.0625,1	2	96.5547		0.0625,1	2	112.493
	0.0625,2	2	105.723		0.0625,2	2	111.29		0.0625,2	2	110.023		0.0625,2	2	112.583		0.0625,2	2	98.6789
	0.0625,3	2	113.186		0.0625,3	2	106.529		0.0625,3	2	108.733		0.0625,3	2	101.692		0.0625,3	2	91.3842
	0.125,1	2	108.28		0.125,1	2	103.459		0.125,1	2	99.7128		0.125,1	2	96.2583		0.125,1	2	109.995
	0.125,2	2	111.85		0.125,2	2	111.843		0.125,2	2	100.792		0.125,2	2	107.323		0.125,2	2	105.918
	0.125,3	2	105.13		0.125,3	2	106.473		0.125,3	2	99.9226		0.125,3	2	107.252		0.125,3	2	101.346
	0.25,1	2	119.293		0.25,1	2	119.683		0.25,1	2	107.724		0.25,1	2	97.2358		0.25,1	2	108.248
	0.25,2	2	115.041		0.25,2	2	115.253		0.25,2	2	110.541		0.25,2	2	112.847		0.25,2	2	120.181
	0.25,3	2	106.808		0.25,3	2	114.719		0.25,3	2	115.313		0.25,3	2	105.774		0.25,3	2	99.0179
	0.5,1	2	127.05		0.5,1	2	125.15		0.5,1	2	124.22		0.5,1	2	112.754		0.5,1	2	121.113
	0.5,2	2	132.815		0.5,2	2	123.951		0.5,2	2	128.117		0.5,2	2	124.396		0.5,2	2	94.6159
	0.5,3	2	113.814		0.5,3	2	119.837		0.5,3	2	124.307		0.5,3	2	119.764		0.5,3	2	97.7688
	1,1	2	130.149		1,1	2	146.204		1,1	2	136.244		1,1	2	121.316		1,1	2	113.204
	1,2	2	147.692		1,2	2	138.368		1,2	2	142.498		1,2	2	117.392		1,2	2	116.817
	1,3	2	121.865		1,3	2	163.585		1,3	2	152.284		1,3	2	126.75		1,3	2	108.536
	DMEMFCS,1	3	107.427		DMEMFCS,1	3	103.085		DMEMFCS,1	3	103.085		DMEMFCS,1	3	107.427		DMEMFCS,1	3	100.553
	DMEMFCS,2	3	94.1838		DMEMFCS,2	3	98.17		DMEMFCS,2	3	98.17		DMEMFCS,2	3	94.1838		DMEMFCS,2	3	99.9126
	DMEMFCS,3	3	98.3893		DMEMFCS,3	3	98.7455		DMEMFCS,3	3	98.7455		DMEMFCS,3	3	98.3893		DMEMFCS,3	3	99.5348
	0.0039,1	3	93.6177		0.0039,1	3	94.4299		0.0039,1	3	84.187		0.0039,1	3	92.3177		0.0039,1	3	101.766
	0.0039,2	3	99.9581		0.0039,2	3	95.6901		0.0039,2	3	85.5019		0.0039,2	3	88.9961		0.0039,2	3	97.299
	0.0039,3	3	97.856		0.0039,3	3	88.1917		0.0039,3	3	92.9709		0.0039,3	3	99.1185		0.0039,3	3	90.4026
	0.0078,1	3	99.9856		0.0078,1	3	110.86		0.0078,1	3	90.2208		0.0078,1	3	91.2455		0.0078,1	3	104.446
	0.0078,2	3	103.694		0.0078,2	3	96.9946		0.0078,2	3	88.0406		0.0078,2	3	89.68		0.0078,2	3	91.3481
	0.0078,3	3	98.3459		0.0078,3	3	106.458		0.0078,3	3	93.8758		0.0078,3	3	95.916		0.0078,3	3	91.5976
	0.0156,1	3	87.8599		0.0156,1	3	90.8411		0.0156,1	3	91.6928		0.0156,1	3	85.374		0.0156,1	3	96.3244
	0.0156,2	3	101.062		0.0156,2	3	94.1062		0.0156,2	3	90.3588		0.0156,2	3	86.0283		0.0156,2	3	84.4245
	0.0156,2	3	89.6175		0.0156,2	3	85.4711		0.0156,2	3	91.6048		0.0156,2	3	91.8056		0.0156,2	3	84.4616
	0.0313,1	3	90.4539		0.0313,1	3	101.5		0.0313,1	3	93.1459		0.0313,1	3	86.0423		0.0313,1	3	84.7188
	0.0313,2	3	103.539		0.0313,2	3	92.9233		0.0313,2	3	91.3418		0.0313,2	3	85.7105		0.0313,2	3	89.4073
	0.0313,3	3	95.6812		0.0313,3	3	93.2753		0.0313,3	3	90.5301		0.0313,3	3	85.7676		0.0313,3	3	91.0768
	0.0625,1	3	90.7461		0.0625,1	3	112.851		0.0625,1	3	84.9976		0.0625,1	3	88.766		0.0625,1	3	82.402
	0.0625,2	3	103.215		0.0625,2	3	99.1924		0.0625,2	3	103.868		0.0625,2	3	85.8921		0.0625,2	3	89.9464
	0.0625,3	3	94.6341		0.0625,3	3	91.8409		0.0625,3	3	95.6898		0.0625,3	3	91.1672		0.0625,3	3	87.0703
	0.125,1	3	93.3463		0.125,1	3	113.146		0.125,1	3	93.7478		0.125,1	3	89.1964		0.125,1	3	98.2897
	0.125,2	3	105.299		0.125,2	3	95.6936		0.125,2	3	94.5752		0.125,2	3	86.0235		0.125,2	3	92.3076
	0.125,3	3	98.5315		0.125,3	3	101.191		0.125,3	3	97.1731		0.125,3	3	91.6462		0.125,3	3	85.3373
	0.25,1	3	97.0726		0.25,1	3	111.018		0.25,1	3	97.4707		0.25,1	3	90.6075		0.25,1	3	86.4934
	0.25,2	3	109.372		0.25,2	3	107.598		0.25,2	3	108.791		0.25,2	3	86.2102		0.25,2	3	100.122
	0.25,3	3	99.2597		0.25,3	3	105.952		0.25,3	3	99.5432		0.25,3	3	91.5767		0.25,3	3	94.6528
	0.5,1	3	104.685		0.5,1	3	110.263		0.5,1	3	103.91		0.5,1	3	122.117		0.5,1	3	97.8543
	0.5,2	3	118.697		0.5,2	3	111.17		0.5,2	3	108.076		0.5,2	3	95.9033		0.5,2	3	96.2698
	0.5,3	3	108.27		0.5,3	3	115.672		0.5,3	3	103.696		0.5,3	3	100.063		0.5,3	3	96.4839
	1,1	3	119.776		1,1	3	162.307		1,1	3	127.752		1,1	3	139.691		1,1	3	79.5296
	1,2	3	136.946		1,2	3	137.898		1,2	3	130.932		1,2	3	134.412		1,2	3	87.24
	1,3	3	120.347		1,3	3	147.831		1,3	3	115.782		1,3	3	113.024		1,3	3	93.4167
	DMEMFCS,1	4	110.86		DMEMFCS,1	4	103.164		DMEMFCS,1	4	103.164		DMEMFCS,1	4	110.86		DMEMFCS,1	4	94.4183
	DMEMFCS,2	4	95.2481		DMEMFCS,2	4	96.5228		DMEMFCS,2	4	96.5228		DMEMFCS,2	4	95.2481		DMEMFCS,2	4	99.267
	DMEMFCS,3	4	93.892		DMEMFCS,3	4	100.313		DMEMFCS,3	4	100.313		DMEMFCS,3	4	93.892		DMEMFCS,3	4	106.315
	0.0039,1	4	102.896		0.0039,1	4	111.018		0.0039,1	4	110.486		0.0039,1	4	79.1794		0.0039,1	4	82.9079
	0.0039,2	4	95.2383		0.0039,2	4	83.5419		0.0039,2	4	103.798		0.0039,2	4	95.4169		0.0039,2	4	70.2011
	0.0039,3	4	103.111		0.0039,3	4	113.097		0.0039,3	4	91.1321		0.0039,3	4	89.5121		0.0039,3	4	71.3469
	0.0078,1	4	101.516		0.0078,1	4	103.88		0.0078,1	4	106.359		0.0078,1	4	103.814		0.0078,1	4	88.3178
	0.0078,2	4	86.3895		0.0078,2	4	93.8738		0.0078,2	4	96.1963		0.0078,2	4	105.975		0.0078,2	4	84.0362
	0.0078,3	4	94.8849		0.0078,3	4	95.2634		0.0078,3	4	98.0542		0.0078,3	4	115.432		0.0078,3	4	84.238
	0.0156,1	4	92.8887		0.0156,1	4	93.039		0.0156,1	4	115.37		0.0156,1	4	99.5068		0.0156,1	4	82.8117
	0.0156,2	4	93.2235		0.0156,2	4	93.0694		0.0156,2	4	107.689		0.0156,2	4	118.099		0.0156,2	4	93.646
	0.0156,2	4	94.208		0.0156,2	4	95.7665		0.0156,2	4	92.1308		0.0156,2	4	128.881		0.0156,2	4	86.4562
	0.0313,1	4	99.9381		0.0313,1	4	93.0213		0.0313,1	4	99.5402		0.0313,1	4	92.458		0.0313,1	4	76.3758
	0.0313,2	4	80.2296		0.0313,2	4	89.2603		0.0313,2	4	102.278		0.0313,2	4	93.5105		0.0313,2	4	85.5041
	0.0313,3	4	86.7239		0.0313,3	4	102.653		0.0313,3	4	97.2789		0.0313,3	4	107.712		0.0313,3	4	81.5779
	0.0625,1	4	91.1074		0.0625,1	4	98.1045		0.0625,1	4	97.7159		0.0625,1	4	83.201		0.0625,1	4	88.4336
	0.0625,2	4	89.5835		0.0625,2	4	98.4147		0.0625,2	4	123.73		0.0625,2	4	78.5055		0.0625,2	4	78.1035
	0.0625,3	4	94.7935		0.0625,3	4	105.185		0.0625,3	4	100.171		0.0625,3	4	97.0559		0.0625,3	4	80.504
	0.125,1	4	102.273		0.125,1	4	107.611		0.125,1	4	101.499		0.125,1	4	92.6433		0.125,1	4	81.7146
	0.125,2	4	80.3991		0.125,2	4	97.9314		0.125,2	4	106.821		0.125,2	4	96.519		0.125,2	4	88.8479
	0.125,3	4	101.201		0.125,3	4	102.296		0.125,3	4	101.283		0.125,3	4	91.8642		0.125,3	4	86.9129
	0.25,1	4	98.8123		0.25,1	4	98.5496		0.25,1	4	96.0317		0.25,1	4	83.5302		0.25,1	4	88.9422
	0.25,2	4	89.3691		0.25,2	4	110.183		0.25,2	4	123.075		0.25,2	4	86.4292		0.25,2	4	86.5821
	0.25,3	4	95.1781		0.25,3	4	102.049		0.25,3	4	99.6338		0.25,3	4	86.8567		0.25,3	4	102.57
	0.5,1	4	127.218		0.5,1	4	118.225		0.5,1	4	102.676		0.5,1	4	94.3111		0.5,1	4	86.2612
	0.5,2	4	103.12		0.5,2	4	130.406		0.5,2	4	123.076		0.5,2	4	95.4576		0.5,2	4	96.8174
	0.5,3	4	114.947		0.5,3	4	114.778		0.5,3	4	123.418		0.5,3	4	112.27		0.5,3	4	122.316
	1,1	4	205.228		1,1	4	163.276		1,1	4	119.996		1,1	4	98.9787		1,1	4	69.5615
	1,2	4	124.134		1,2	4	174.821		1,2	4	147.518		1,2	4	91.4656		1,2	4	86.3276
	1,3	4	132.695		1,3	4	142.15		1,3	4	141.122		1,3	4	115.64		1,3	4	128.386
	DMEMFCS,1	5	109.425		DMEMFCS,1	5	95.6845		DMEMFCS,1	5	95.6845		DMEMFCS,1	5	109.425		DMEMFCS,1	5	96.6944
	DMEMFCS,2	5	89.8443		DMEMFCS,2	5	95.4727		DMEMFCS,2	5	95.4727		DMEMFCS,2	5	89.8443		DMEMFCS,2	5	102.005
	DMEMFCS,3	5	100.731		DMEMFCS,3	5	108.843		DMEMFCS,3	5	108.843		DMEMFCS,3	5	100.731		DMEMFCS,3	5	101.3
	0.0039,1	5	87.3583		0.0039,1	5	94.1921		0.0039,1	5	90.1935		0.0039,1	5	95.979		0.0039,1	5	79.7384
	0.0039,2	5	97.3534		0.0039,2	5	92.2664		0.0039,2	5	93.5762		0.0039,2	5	94.17		0.0039,2	5	103.213
	0.0039,3	5	105.893		0.0039,3	5	101.198		0.0039,3	5	117.093		0.0039,3	5	84.2768		0.0039,3	5	69.2061
	0.0078,1	5	85.7616		0.0078,1	5	96.3334		0.0078,1	5	91.9398		0.0078,1	5	102.97		0.0078,1	5	86.9145
	0.0078,2	5	90.4258		0.0078,2	5	90.9905		0.0078,2	5	88.0619		0.0078,2	5	86.3308		0.0078,2	5	92.9344
	0.0078,3	5	92.419		0.0078,3	5	93.3355		0.0078,3	5	104.905		0.0078,3	5	90.4507		0.0078,3	5	73.7823
	0.0156,1	5	95.6894		0.0156,1	5	96.272		0.0156,1	5	89.1995		0.0156,1	5	90.9451		0.0156,1	5	88.5441
	0.0156,2	5	96.8225		0.0156,2	5	95.4036		0.0156,2	5	92.3174		0.0156,2	5	83.6382		0.0156,2	5	80.9754
	0.0156,2	5	91.8592		0.0156,2	5	94.3336		0.0156,2	5	100.7		0.0156,2	5	101.702		0.0156,2	5	92.7156
	0.0313,1	5	86.46		0.0313,1	5	101.233		0.0313,1	5	96.9418		0.0313,1	5	88.0393		0.0313,1	5	91.684
	0.0313,2	5	78.86		0.0313,2	5	89.3399		0.0313,2	5	95.1637		0.0313,2	5	85.444		0.0313,2	5	80.2146
	0.0313,3	5	83.05		0.0313,3	5	92.5691		0.0313,3	5	120.051		0.0313,3	5	101.121		0.0313,3	5	78.6509
	0.0625,1	5	86.4684		0.0625,1	5	102.859		0.0625,1	5	97.562		0.0625,1	5	93.4783		0.0625,1	5	97.978
	0.0625,2	5	79.219		0.0625,2	5	92.8721		0.0625,2	5	92.7956		0.0625,2	5	87.0867		0.0625,2	5	78.2226
	0.0625,3	5	82.4272		0.0625,3	5	104.83		0.0625,3	5	104.999		0.0625,3	5	88.8256		0.0625,3	5	73.6664
	0.125,1	5	94.9237		0.125,1	5	97.5349		0.125,1	5	95.3036		0.125,1	5	86.7229		0.125,1	5	91.0169
	0.125,2	5	99.6084		0.125,2	5	92.7291		0.125,2	5	93.2643		0.125,2	5	87.9078		0.125,2	5	81.4918
	0.125,3	5	81.0398		0.125,3	5	98.3374		0.125,3	5	107.927		0.125,3	5	92.4618		0.125,3	5	75.7397
	0.25,1	5	90.9849		0.25,1	5	117.715		0.25,1	5	96.5641		0.25,1	5	89.9218		0.25,1	5	81.4265
	0.25,2	5	96.0891		0.25,2	5	115.16		0.25,2	5	96.0029		0.25,2	5	84.3841		0.25,2	5	76.9142
	0.25,3	5	96.3801		0.25,3	5	103.793		0.25,3	5	105.754		0.25,3	5	92.7461		0.25,3	5	77.8994
	0.5,1	5	97.3049		0.5,1	5	144.099		0.5,1	5	110.463		0.5,1	5	93.6601		0.5,1	5	88.1161
	0.5,2	5	102.275		0.5,2	5	129.744		0.5,2	5	104.988		0.5,2	5	103.233		0.5,2	5	82.1625
	0.5,3	5	88.6588		0.5,3	5	136.414		0.5,3	5	107.989		0.5,3	5	100.327		0.5,3	5	72.5331
	1,1	5	99.3894		1,1	5	221.519		1,1	5	125.962		1,1	5	107.093		1,1	5	92.4936
	1,2	5	102.35		1,2	5	219.78		1,2	5	101.707		1,2	5	86.5978		1,2	5	89.3067
	1,3	5	115.228		1,3	5	138.289		1,3	5	149.027		1,3	5	126.181		1,3	5	172.603
	Estimated means from GEE				Estimated means from GEE				Estimated means from GEE				Estimated means from GEE				Estimated means from GEE
	Treatment (mg/mL)	Estimated Mean Viablity (%)	SE	P value (vs. DMEM+FCS)	Treatment (mg/mL)	Estimated Mean Viablity (%)	SE	P value (vs. DMEM+FCS)	Treatment (mg/mL)	Estimated Mean Viablity (%)	SE	P value (vs. DMEM+FCS)	Treatment (mg/mL)	Estimated Mean Viablity (%)	SE	P value (vs. DMEM+FCS)	Treatment (mg/mL)	Estimated Mean Viablity (%)	SE	P value (vs. DMEM+FCS)
	0	100			0	100			0	100			0	100			0	100
	0.0039	100.363	2.046		0.0039	98.4706	2.14333		0.0039	97.3439	2.85172		0.0039	92.7971	1.83821		0.0039	86.8169	4.11601
	0.0078	97.1914	2.84754		0.0078	98.8148	2.01038		0.0078	96.1571	1.83914		0.0078	99.8875	3.59921		0.0078	90.226	2.60375
	0.0156	95.8376	1.89103		0.0156	95.4165	2.18562		0.0156	97.5496	2.66803		0.0156	99.0746	5.3064		0.0156	88.9312	0.98168
	0.0313	93.0182	3.94486		0.0313	97.1425	1.80138		0.0313	99.0187	2.26972		0.0313	94.1489	2.97302		0.0313	87.9871	3.40482
	0.0625	94.9831	4.77192	0.2931	0.0625	102.37	1.47455	0.1079	0.0625	102.04	2.76935	0.4613	0.0625	92.0674	3.39251	0.0194	0.0625	88.2403	3.7201	0.0016
	0.125	98.4901	3.14111	0.6307	0.125	102.354	1.98378	0.2354	0.125	99.3351	1.44128	0.6446	0.125	93.8182	2.98417	0.0383	0.125	91.5764	4.41678	0.0565
	0.25	101.138	3.93458	0.7723	0.25	110.139	2.39931	0	0.25	104.704	2.2341	0.0353	0.25	92.3432	3.80992	0.0445	0.25	93.5875	5.38068	0.2334
	0.5	111.571	5.13662	0.0243	0.5	123.309	4.36794	0	0.5	113.745	3.98469	0.0006	0.5	106.188	3.90835	0.1134	0.5	96.026	4.56547	0.3841
	1	129.65	8.65341	0.0006	1	163.002	8.9865	0	1	132.569	3.91865	0	1	114.878	5.4889	0.0067	1	103.119	6.41652	0.627

## Sheet: Extract Composition
	Data underlying Figure 4A
	Protein Content (% w/w)
		FSE	CSE	HSE	HHE	HFE
	Replicate 1	20.4	7.62667	17.7333	8.28	8.14667
	Replicate 2	19.4667	7.74667	17.4667	8.33333	8.18667
	Replicate 3	22	7.44	18.2667	8.34667	8.24
	Average	20.6222	7.60444	17.8222	8.32	8.19111
	Standard Deviation	1.2812	0.154537	0.407341	0.0352767	0.0468251
	Monosaccharide Content (% w/w)
		FSE				CSE				HSE				HHE				HFE
	Monosaccharide	Rep 1	Rep 2	Average	SD	Rep 1	Rep 2	Average	SD	Rep 1	Rep 2	Average	SD	Rep 1	Rep 2	Average	SD	Rep 1	Rep 2	Average	SD
	Mannose	0	0	0	0	0	0	0	0	0	0	0	0	0	0	0	0	0	0	0	0
	Ribose	0	0	0	0	0	0	0	0	1.37838	1.33142	1.3549	0.0332078	1.43163	1.38991	1.41077	0.0294976	0	0	0	0
	Rhamnose	1.41867	1.60454	1.51161	0.131432	0.429502	0.442962	0.436232	0.00951732	0	0	0	0	0	0	0	0	0	0	0	0
	Glucuronic Acid	0	0	0	0	2.51548	2.5349	2.52519	0.0137339	0	0	0	0	0	0	0	0	0	0	0	0
	Galacturonic Acid	3.94848	4.1437	4.04609	0.13804	2.39738	2.20761	2.3025	0.134187	0	0	0	0	0	0	0	0	4.52411	4.88054	4.70233	0.252032
	Glucose	6.20278	6.62647	6.41462	0.299593	6.29917	6.61377	6.45647	0.222458	9.41822	9.27816	9.34819	0.0990387	6.60513	6.29529	6.45021	0.219092	19.5047	19.3642	19.4345	0.0993605
	Galactose	3.8148	4.27229	4.04355	0.32349	4.15413	4.07568	4.11491	0.0554676	2.75368	2.69757	2.72563	0.0396757	0.827107	0.810105	0.818606	0.0120219	2.47744	2.47541	2.47643	0.00143982
	Xylose	4.90818	5.76117	5.33468	0.60315	5.07021	5.01066	5.04043	0.0421147	0	0	0	0	0	0	0	0	0.871027	0.881657	0.876342	0.00751705
	Arabinose	1.54896	1.79029	1.66963	0.170645	0.728953	0.715687	0.72232	0.00938081	0.202039	0.177712	0.189876	0.0172016	0.116211	0.105099	0.110655	0.00785726	0.496198	0.50156	0.498879	0.00379198
	Fucose	0.689229	0.786434	0.737831	0.0687343	0	0	0	0	0	0	0	0	0	0	0	0	0	0	0	0
	Sum	22.5311	24.9849	23.758	1.73509	21.5948	21.6013	21.598	0.00455868	13.7523	13.4849	13.6186	0.189124	8.98008	8.60041	8.79025	0.268468	27.8735	28.1034	27.9885	0.16254
	Mineral Content
		FSE	CSE	HSE	HHE	HFE
	Na (mg/Kg)	2968.73	0	86.8344	3.41309	508.867
	Mg (mg/Kg)	4100.77	7179.76	4434.27	3725.03	6987.89
	K (mg/Kg)	16318.4	32051.5	22204.9	18151.6	49941.7
	Ca (mg/Kg)	837.54	3394.62	902.95	320.792	2319.93
	Cr (mg/Kg)	2.74478	2.48836	1.95573	1.55265	1.88611
	Mn (mg/Kg)	6.63237	29.7367	23.7729	53.5155	226.412
	Fe (mg/Kg)	141.19	111.351	148.797	121.91	110.257
	Co (mg/Kg)	2.25042	2.1604	0.253595	0.127744	0.257563
	Ni (mg/Kg)	4.42473	8.08534	16.4152	2.82715	6.33332
	Cu (mg/Kg)	36.8683	18.1279	75.9388	20.3703	45.1684
	Zn (mg/Kg)	21.358	26.0958	82.6608	58.2591	97.1054
	Se (mg/Kg)	2.62289	3.36549	2.92399	3.2669	3.65462
	Mo (mg/Kg)	0.378894	0.781342	0.783627	2.73254	2.69844
	I (mg/Kg)	608.315	788.763	584.561	417.694	981.623
	Data underlying Figure 4B
		FSE	CSE	HSE	HHE	HFE
	Protein (% w/w)	20.6222	7.60444	17.8222	8.32	8.19111
	Carbohydrates (% w/w)	23.76	21.6	13.62	8.79	27.99
	Minerals (% w/w)	2.50707	4.36747	2.86212	6.13707	2.29163
	Other (% w/w)	53.1107	66.4281	65.6957	76.7529	61.5273

## Sheet: Extract Mineral Composition
	Data underlying Figure 5A
		Flax		Chia		Hulled Sunflower		Hulled Hemp		Hemp Flour
		Flour	Extract	Flour	Extract	Flour	Extract	Flour	Extract	Flour	Extract
	Na (mg/Kg)	1073.1	2968.73	0	0	0	86.8344	0	3.41309	0	508.867
	Mg (mg/Kg)	4424.56	4100.77	3524.58	7179.76	3493.4	4434.27	5359.02	3725.03	3296.82	6987.89
	K (mg/Kg)	7481.72	16318.4	7678.79	32051.5	7930.05	22204.9	9746.92	18151.6	7367.42	49941.7
	Ca (mg/Kg)	1388.39	837.54	5689.41	3394.62	1289.35	902.95	349.285	320.792	982.679	2319.93
	Cr (mg/Kg)	2.06862	2.74478	1.98849	2.48836	1.54471	1.95573	1.97563	1.55265	1.35595	1.88611
	Mn (mg/Kg)	23.3684	6.63237	30.6329	29.7367	31.5454	23.7729	68.0666	53.5155	91.5179	226.412
	Fe (mg/Kg)	142.97	141.19	145.383	111.351	80.6079	148.797	196.037	121.91	196.305	110.257
	Co (mg/Kg)	0.940884	2.25042	0.288047	2.1604	0.0945172	0.253595	0.0715881	0.127744	0.0517036	0.257563
	Ni (mg/Kg)	1.14712	4.42473	1.83786	8.08534	5.17947	16.4152	53.229	2.82715	0.639295	6.33332
	Cu (mg/Kg)	17.3659	36.8683	17.7405	18.1279	24.2326	75.9388	12.1593	20.3703	14.1251	45.1684
	Zn (mg/Kg)	43.6486	21.358	51.9627	26.0958	66.1171	82.6608	81.6461	58.2591	53.0109	97.1054
	Se (mg/Kg)	0.902106	2.62289	0.884022	3.36549	0	2.92399	1.84073	3.2669	0.952108	3.65462
	Mo (mg/Kg)	0.19604	0.378894	0.744757	0.781342	0.282722	0.783627	1.10541	2.73254	0.608297	2.69844
	I (mg/Kg)	274.356	608.315	267.632	788.763	403.734	584.561	259.367	417.694	314.727	981.623
	Data underlying Figure 5B
			Extractability (%)		Extractability (%)		Extractability (%)		Extractability (%)		Extractability (%)
	Extract Yield (% of kg)	0.0015785		0.0006513		0.0010024		0.0012935		0.0003222
	Na (mg/Kg)	4.68614	109.173	0	#DIV/0!	0.0870428	#DIV/0!	0.00441483	#DIV/0!	0.163957	#DIV/0!
	Mg (mg/Kg)	6.47306	36.5746	4.67618	33.1684	4.44491	31.8093	4.81833	22.4777	2.2515	17.0732
	K (mg/Kg)	25.7586	86.0719	20.8752	67.9637	22.2582	70.1706	23.4791	60.2217	16.0912	54.6026
	Ca (mg/Kg)	1.32206	23.8055	2.21092	9.71507	0.905117	17.5498	0.414944	29.6996	0.747483	19.0165
	Cr (mg/Kg)	0.00433263	52.3614	0.00162067	20.3757	0.00196042	31.7281	0.00200835	25.4141	0.000607705	11.2044
	Mn (mg/Kg)	0.0104692	11.2001	0.0193675	15.8061	0.02383	18.8855	0.0692223	25.4245	0.0729498	19.9278
	Fe (mg/Kg)	0.222868	38.9713	0.0725232	12.471	0.149154	46.2591	0.157691	20.1099	0.0355248	4.52418
	Co (mg/Kg)	0.00355229	94.3871	0.00140707	122.121	0.000254204	67.2376	0.000165237	57.704	8.29869e-05	40.1263
	Ni (mg/Kg)	0.00698443	152.216	0.00526598	71.6319	0.0164546	79.4223	0.00365692	1.71754	0.0020406	79.7987
	Cu (mg/Kg)	0.0581966	83.7798	0.0118067	16.638	0.076121	78.5315	0.026349	54.1748	0.0145533	25.7579
	Zn (mg/Kg)	0.0337137	19.3097	0.0169962	8.1771	0.0828592	31.3305	0.0753582	23.0746	0.0312873	14.7551
	Se (mg/Kg)	0.00414023	114.738	0.00219194	61.9878	0.00293101	#DIV/0!	0.00422574	57.3921	0.00117752	30.9187
	Mo (mg/Kg)	0.000598084	76.2705	0.000508888	17.0824	0.000785508	69.4595	0.00353455	79.9371	0.000869437	35.7324
	I (mg/Kg)	0.960225	87.4981	0.513722	47.9876	0.585964	36.2841	0.540287	52.0774	0.316279	25.1233

## Sheet: FRAP
	Data underlying Supplementary Figure 1
		FRAP Value (mmol Fe2+ /g)
		FSE	CSE	HSE	HHE	HFE
	Replicate 1	0.56	0.68	2.02	0.18	0.23
	Replicate 2	0.51	0.66	1.86	0.16	0.22
	Replicate 3	0.46	0.68	1.75	0.12	0.2
	Average	0.51	0.673333	1.87667	0.153333	0.216667
	Standard Deviation	0.05	0.011547	0.135769	0.0305505	0.0152753
	Tukey HSD	b	b	c	a	a
